# Supplementary material for: The effect of rehabilitation time on functional recovery after arthroscopic rotator cuff repair: a systematic review and meta-analysis
Source: PeerJ. 2024 May 20;12:e17395. doi: 10.7717/peerj.17395 (PMC11114118; doi:10.7717/peerj.17395)
Supplement: Supplemental Information 1 [file peerj-12-17395-s001.xlsx]

## Sheet: Sheet1
	Early exercise			Delay exercise
	MEAN	SD	TOTAL	MEAN	SD	TOTAL
guo2019	1.2	0.3	30	1.1	0.4	30
huang2015	1	1.3	33	1.1	1.7	32
keener2014	1.1	1.7	61	0.9	1.2	53
kim2012	2.8	0.22	56	1.8	0.22	49
lee2012	1.47	0.98	30	1.53	0.98	34
mazzocca2017	0.7	1.5	37	0.9	1.5	36
sheps2015	0.6	1	97	0.6	1	92
guo2019	1.2	0.3	30	1.1	0.4	30
huang2015	1	1.3	33	1.1	1.7	32
keener2014	1.1	1.7	61	0.9	1.2	53
kim2012	2.8	0.22	56	1.8	0.22	49
lee2012	1.47	0.98	30	1.53	0.98	34
mazzocca2017	0.7	1.5	37	0.9	1.5	36
sheps2015	0.6	1	97	0.6	1	92
Arndt J2012	158.4	22.9	49	146.4	30	43
cuff2012	172	6.96	33	165	6.96	35
huang2015	154.2	13.7	33	153.7	14.3	32
keener2014	155	18.1	61	154	17.8	53
kim2012	150.57	33.27	56	147.14	21.24	49
lee2012	157.3	11.4	30	151.9	18.2	34
mazzocca2017	173	20	37	173	10	36
sheps2015	142.3	22.6	97	141.3	22.6	92
Arndt J2012	171.9	13.6	49	161.9	26.2	43
cuff2012	174	3	33	173	3.5	35
huang2015	161.4	12.6	33	161.8	13.1	32
keener2014	161	13.4	61	159	22.8	53
kim2012	159.75	30.96	56	153.67	23.47	49
lee2012	155.3	13	30	153	12.2	34
mazzocca2017	176	11	37	173	17	36
sheps2015	150.9	12.6	97	149	19.9	92
Arndt J2012	54.3	12.5	49	44.3	19.4	43
cuff2012	44	9.6	33	43	9.6	35
huang2015	47.5	13.5	33	46.8	14.6	32
keener2014	61.6	17.8	61	63.9	15.1	53
kim2012	77.21	20.13	56	72.86	29.73	49
lee2012	50.3	11.2	30	41.6	14.9	34
mazzocca2017	63	16	37	61	17	36
sheps2015	67.6	21	97	62.9	21.6	92
Arndt J2012	58.1	13.2	49	48.3	18.2	43
cuff2012	46	9.6	33	45	9.6	35
huang2015	48.1	10.4	33	47.9	11.3	32
keener2014	84.7	13.9	61	88.6	11.9	53
kim2012	78.5	25.84	56	81.33	36.55	49
lee2012	53	11.6	30	48.1	13.9	34
mazzocca2017	61	18	37	58	17	36
sheps2015	77.9	13.4	97	80.3	13.9	92
keener2014	81.1	16.2	61	84.3	15.1	53
kim2012	67.08	20.5	56	69.89	20.61	49
mazzocca2017	88	16	37	80	19	36
cuff2012	91.1	2.4	33	92.8	2.4	35
keener2014	88.1	15.8	61	89.1	14.1	53
kim2012	73.29	56.16	56	82.9	27.53	49
mazzocca2017	90	15	37	84	19	36
guo2019	8.8	2.9	30	8.9	3	30
huang2015	9.3	2.7	33	9.1	2.6	32
keener2014	9.1	2.7	61	9.3	2.9	53
kim2012	7.81	3.24	56	6.7	3.64	49
mazzocca2017	10	2.4	37	8.7	3.3	36
cuff2012	5.5	0.93	33	5.1	0.93	35
guo2019	10.8	1.7	30	11	2	30
huang2015	10.8	1.9	33	10.7	2	32
keener2014	10.8	1.8	61	10.6	2.5	53
kim2012	9	5.45	56	9	4.7	49
mazzocca2017	10.2	2.6	37	9.3	3.6	36
	Early exercise		Delay exercise
	EVENTS	TOTAL	EVENTS	TOTAL
Arndt J2012	33	49	33	43
cuff2012	28	33	32	35
huang2015	28	33	28	32
keener2014	57	61	50	53
kim2012	49	56	40	49
lee2012	23	30	31	34
mazzocca2017	21	37	20	36
Arndt J2012	16	49	22	43
cuff2012	3	33	5	35
huang2015	4	33	3	32
keener2014	3	61	6	53
kim2012	9	56	7	49
lee2012	3	30	7	34
sheps2015	1	97	1	92
